# Supplementary material for: Development of Portable E-Nose System for Fast Diagnosis of Whitefly Infestation in Tomato Plant in Greenhouse
Source: MDPI journal article supplement (doi:10.3390/chemosensors9110297), 2021-10-23
Supplement: s1 [file s1]

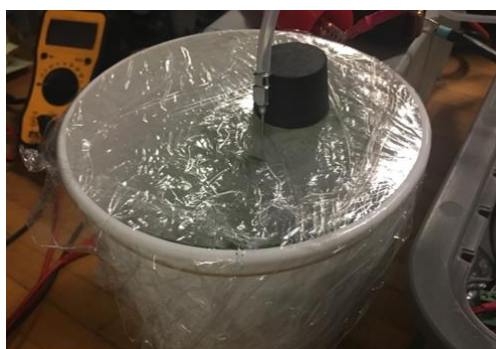

(a)

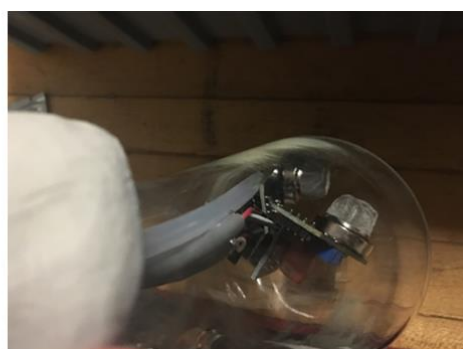

(b)

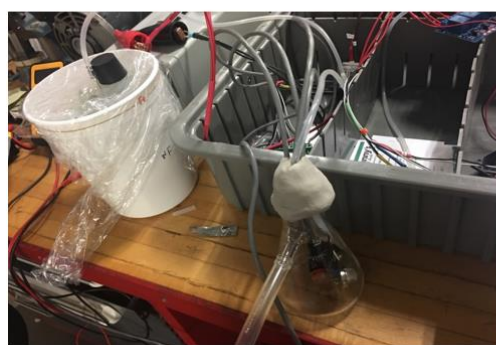

(c)

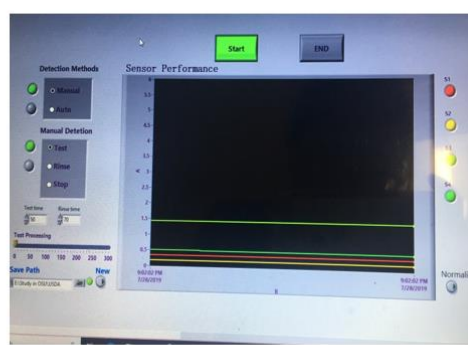

(d)

Figure S1. Photos of developed E-nose system: sampling chamber (a), sensor array chamber (b), a photo of E-nose system (c), and control panel (d).
